# Supplementary material for: Electronic structure and solution behavior of a tris(N,N′-diphenylhydrazido)manganese(iv) propeller complex
Source: Royal Society of Chemistry journal article supplement (doi:10.1039/c2dt30493g), 2012-01-01
Supplement: c2dt30493g.pdf [file c2dt30493g.pdf]

Supporting Information for

**Electronic structure and solution behavior of a tris(*N,N'*-  
diphenylhydrazido)manganese(IV) propeller complex.**

**Sandeep K. Kondaveeti, Shivaiah Vaddypally, Jeffrey D. McCall, Michael J. Zdilla\***

## Contents

|                                           |     |
|-------------------------------------------|-----|
| Determination of cluster equilibrium..... | S-3 |
| Infrared Spectroscopy .....               | S-4 |

### Determination of multinuclear cluster equilibrium.

Dimerization and tetramerization were considered as the causes of speciation to  $S = 0$  species in solution. Assuming no magnetic moment for the multinuclear species, the concentration of monomer is calculated from Equation (7) in the main text.

$$[\mathbf{1}] = \frac{[\mathbf{1}]_0(\mu_{\text{calc}})^2}{(3.87)^2} \quad (7)$$

With the concentration of **1** determined from Equation 7, the concentration of the cluster species may be determined from mass balance. For instance, for the formation of dimers:

$$[\mathbf{1}]_0 = [\mathbf{1}] + 2[\mathbf{1}_2] \quad (8)$$

or

$$[\mathbf{1}_2] = ([\mathbf{1}]_0 - [\mathbf{1}])/2 \quad (9)$$

Or, for the formation of tetramers,

$$[\mathbf{1}]_0 = [\mathbf{1}] + 4[\mathbf{1}_4] \quad (\text{S1})$$

or

$$[\mathbf{1}_4] = ([\mathbf{1}]_0 - [\mathbf{1}])/4 \quad (\text{S2})$$

The equilibrium constant for these two hypothetical situations is determined by plotting, for dimers:

$$[\mathbf{1}]^2 = K_{\text{dim}}[\mathbf{1}_2] \quad (10)$$

and for monomers:

$$[\mathbf{1}]^4 = K_{\text{tet}}[\mathbf{1}_4] \quad (10)$$

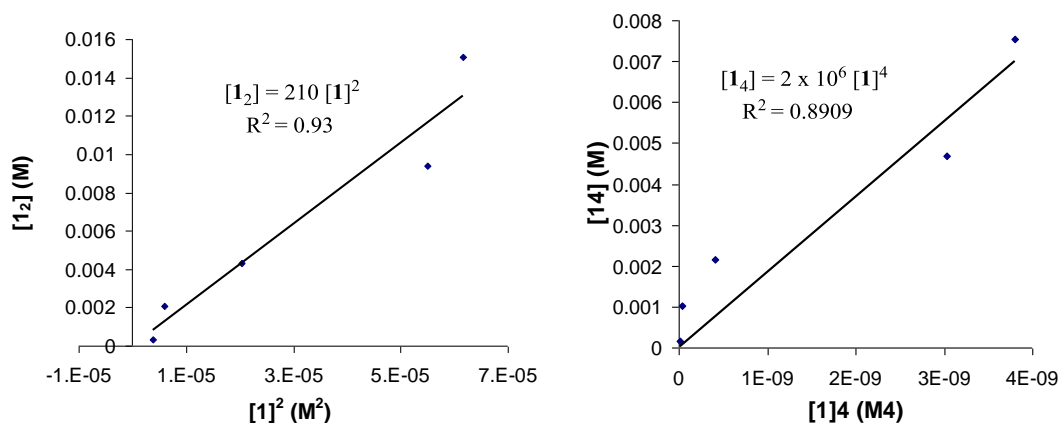

**Figure S1.** Plots of concentration of multinuclear complexes vs.  $[\mathbf{1}]$  for the determination of  $K_{\text{dim}}$  and  $K_{\text{tet}}$ . (slope of the plot). Dimer formation plot gives the superior fit.

## IR spectroscopy

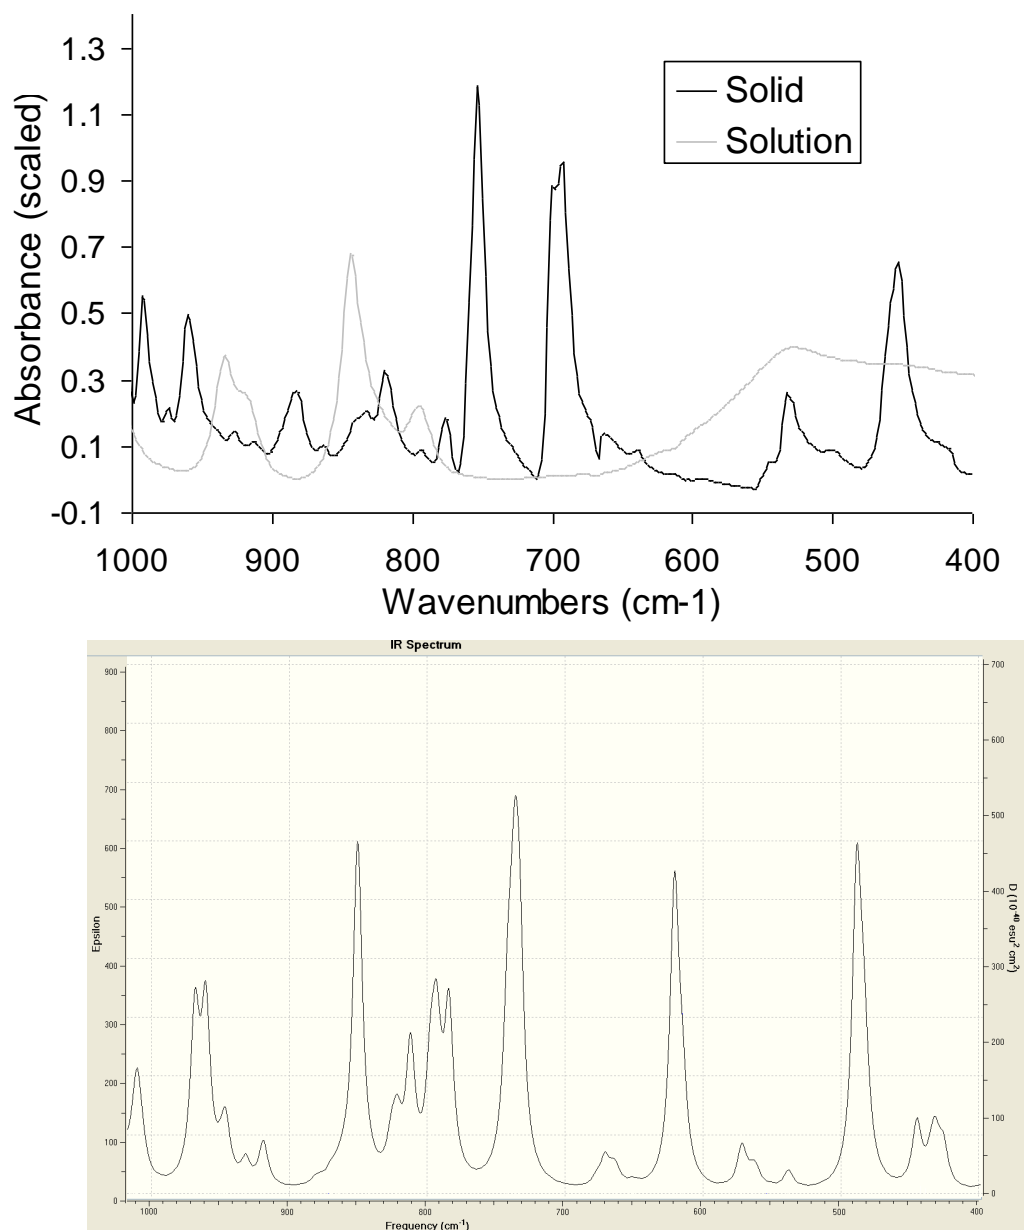

**Figure S2.** Infrared spectrum from experiment (solid and in diethyl ether) and calculated IR spectrum from Density Functional Theory using the B3LYP functional and 3-21G basis set.
